# Supplementary material for: Enhanced degradation of gaseous benzene by a Fenton reaction
Source: Royal Society of Chemistry journal article supplement (doi:10.1039/c6ra26016k), 2016-12-22
Supplement: c6ra26016k1.pdf [file c6ra26016k1.pdf]

## Supplementary Information

### Enhanced degradation of gaseous benzene by Fenton reaction

Gaoyuan Liu, Haibao Huang\*, Ruijie Xie, Qiuyu Feng, Ruimei Fang, Yajie Shu, Yujie Zhan, Xinguo Ye, Cheng Zhong

School of Environmental Science and Engineering, Sun Yat-Sen University, Guangzhou, China.

E-mail: [seabao8@gmail.com](mailto:seabao8@gmail.com)

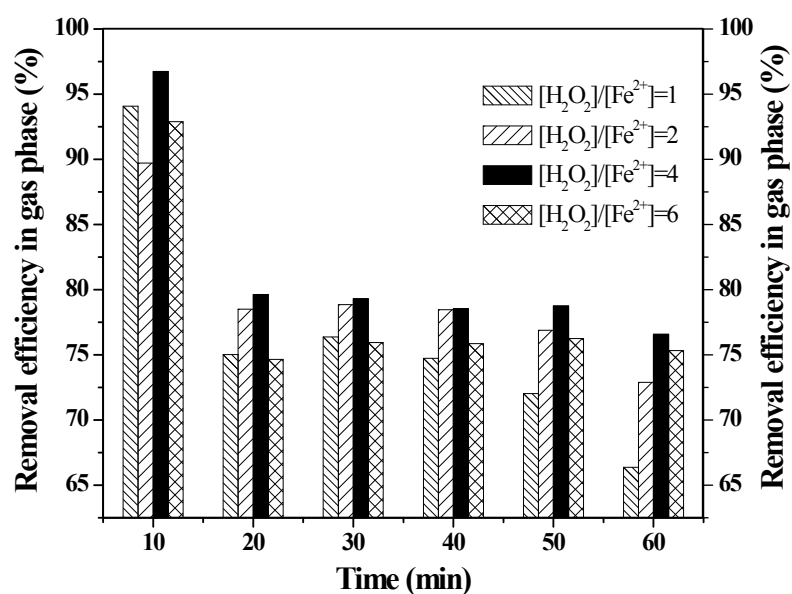

Fig. S1. The molar ratio effects on the benzene degradation

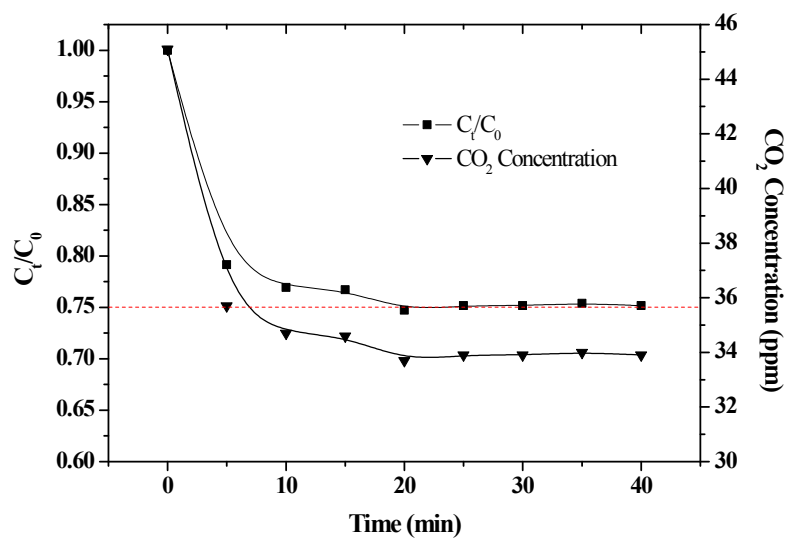

Fig. S2. Case for 45 ppm of  $CO_2$  dissolved in solution

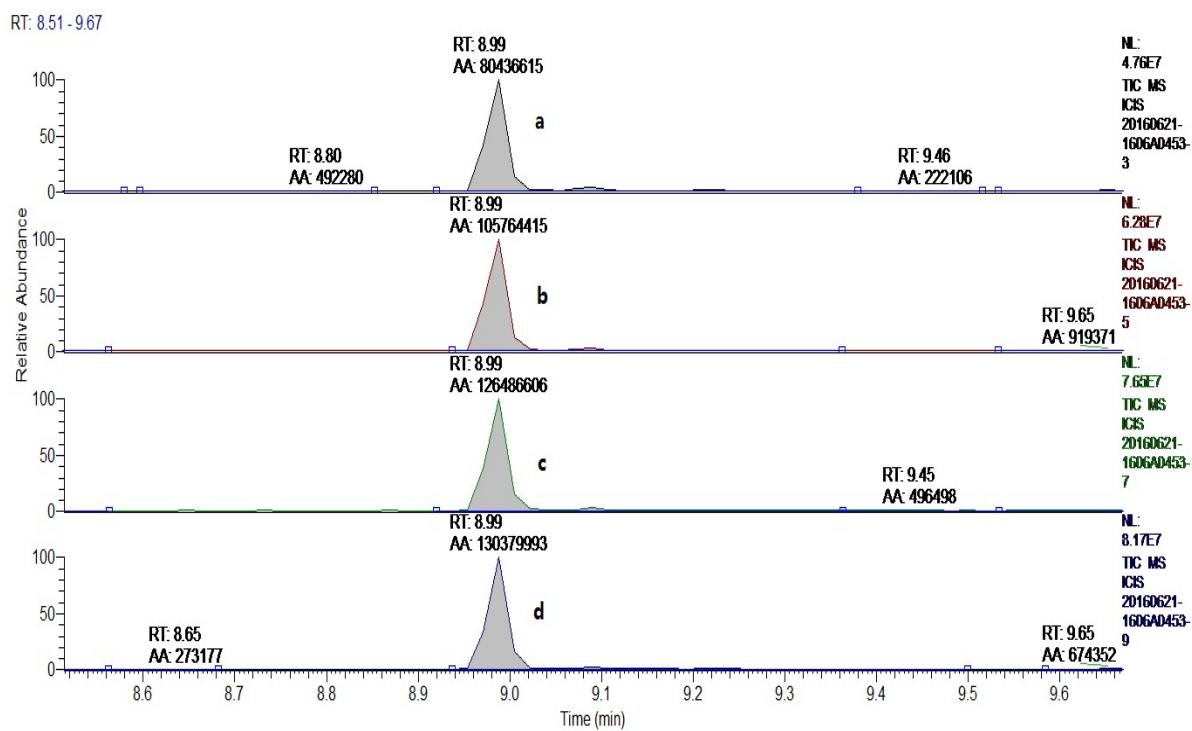

Fig. S3. The intensity of phenol peaks detected by GC-MS: (a) 1<sup>st</sup> round; (b) 2<sup>nd</sup> round; (c) 3<sup>rd</sup> round; (d) 4<sup>th</sup> round.
